# Supplementary material for: The first hunting dog from Dmanisi: comments of social behaviour in Canidae and hominins
Source: Research Square preprint supplement (doi:10.21203/rs.3.rs-201727/v1), 2021-02-18
Supplement: Supplementary file 1 [file 202e8c7700c2b35079d5ac33.xlsx]

## Sheet: Foglio1
Cat. Numb	Side	p1 L	p1 W	p2 L	p2 W	p3 L	p3 W	m1 L	m1 W	trm1 L	tdm1 L	tdm1 W	Mp1H	Mp2H
D6327	L	6.4	4.7	13.8	7.2	16.2	7.2	30.5	11.6	20.6	9.9	11.2	28.7	27.4
